# Supplementary material for: The effect of time spent outdoors during summer on daily blood glucose and steps in women with type 2 diabetes
Source: Springer Nature journal article supplement (doi:10.1007/s10865-019-00113-5), 2019-11-01
Supplement: MOESM6 [file 17342046]

|  | **Model 1** | | | | **Model 2** | | | |
| --- | --- | --- | --- | --- | --- | --- | --- | --- |
|  | β | p-value | L 95%CI | U 95% CI | β | p-value | L 95%CI | U 95% CI |
| Intercept | 145.6 | 0.3 | -124.3 | 415.5 | 234.9 | 0.1 | -43.8 | 513.6 |
| Age | 0.7 | 0.4 | -0.8 | 2.3 | 0.8 | 0.3 | -0.8 | 2.3 |
| BMI | -0.6 | 0.5 | -2.2 | 1.0 | -0.6 | 0.5 | -2.1 | 1.0 |
| Intervention day prior | ... | … | … | … | **-6.2** | **0.02** | **-11.7** | **-0.8** |
| Personal temperature day prior (daily mean hourly) | -0.4 | 0.6 | -1.6 | 0.8 | -0.4 | 0.4 | -1.7 | 0.7 |
| WST Min day prior | -0.08 | 0.9 | -2.4 | 2.2 | -1.2 | 0.3 | -3.7 | 1.2 |
| WST Max day prior | 0.1 | 0.9 | -1.6 | 1.8 | 0.1 | 0.9 | -1.5 | 1.8 |
| WS Precipitation day prior | 4.4 | 0.2 | -2.0 | 10.8 | 4.8 | 0.1 | -1.5 | 11.2 |
|  |  |  |  |  |  |  |  |  |
|  | **Model 3** | | | | **Model 4** | | | |
|  | β | p-value | L 95%CI | U 95% CI | β | p-value | L 95%CI | U 95% CI |
| Intercept | 113.9 | 0.4 | -139.1 | 366.9 | 194.8 | 0.1 | -66.5 | 456.1 |
| Age | 0.7 | 0.4 | -0.8 | 2.3 | 0.8 | 0.3 | -0.8 | 2.3 |
| BMI | -0.6 | 0.5 | -2.1 | 1.0 | -0.5 | 0.5 | -2.1 | 1.0 |
| Intervention day prior | … | … | … | … | **-6.1** | **0.03** | **-11.5** | **-0.6** |
| Personal temperature day prior (daily max hourly) | -0.07 | 0.8 | -0.6 | 0.4 | -0.1 | 0.6 | -0.6 | 0.4 |
| WST Min day prior | -0.07 | 0.9 | -2.4 | 2.2 | -1.2 | 0.3 | -3.7 | 1.3 |
| WST Max day prior | 0.2 | 0.8 | -1.5 | 1.9 | 0.2 | 0.8 | -1.4 | 1.9 |
| WS Precipitation day prior | 4.7 | 0.2 | -1.8 | 11.1 | 5.0 | 0.1 | -1.4 | 11.5 |
